# Supplementary material for: Localized surface plasmon resonance of silver nanoparticles for sensitive colorimetric detection of chromium in surface water, industrial waste water and vegetable samples
Source: Royal Society of Chemistry journal article supplement (doi:10.1039/c5ay03120f), 2016-01-01
Supplement: c5ay03120f1.pdf [file c5ay03120f1.pdf]

**Localized surface plasmon resonance of silver nanoparticles for sensitive  
colorimetric detection of chromium in surface water, industrial waste water and  
vegetable samples**

**Kamlesh Shrivs<sup>1\*</sup>, Swapan Sahu<sup>1</sup>, Goutam Kumar Patra<sup>1</sup>, Nitin Kumar Jaiswal<sup>2</sup> and Ravi  
Shankar<sup>3,4</sup>**

**<sup>1</sup>Department of Chemistry, Guru Ghasidas Vishwavidyalaya, Bilaspur, CG-495009, India**

**<sup>2</sup>Department of Chemistry, School of Engineering and Research, ITM University, Raipur,  
CG-493661, India**

**<sup>3</sup>Nano science and Nanoengineering Program, South Dakota School of Mines and  
Technology, Rapid City, South Dakota, USA**

**<sup>4</sup>Fujifilm Imaging Colorants, Inc. 233 Cherry Lane, New Castle, Delaware 19720, USA**

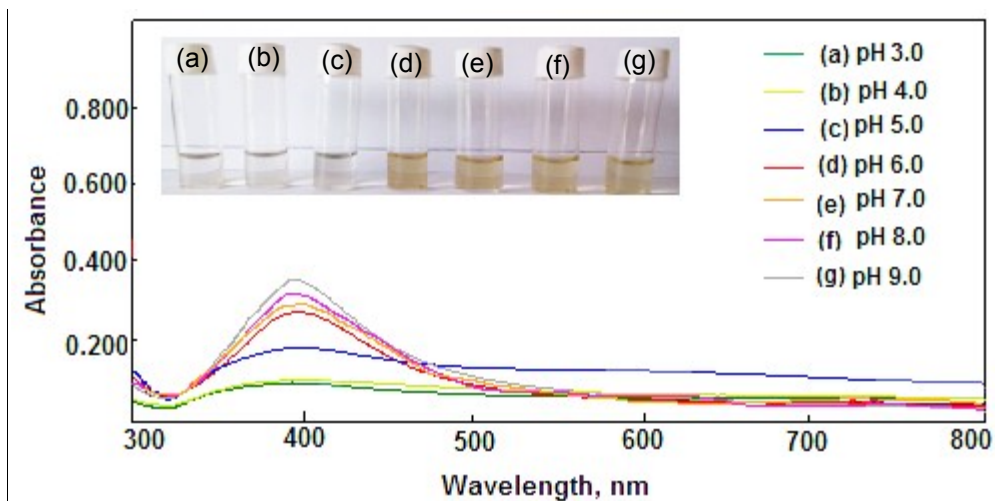

**Fig. S1.** Photographs of glass vials containing AgNPs/TA and different pH solutions (2.0, 3.0, 4.0, 5.0, 6.0, 7.0 and 9.0) for 5 min of reaction time at room temperature along with their UV-visible spectra

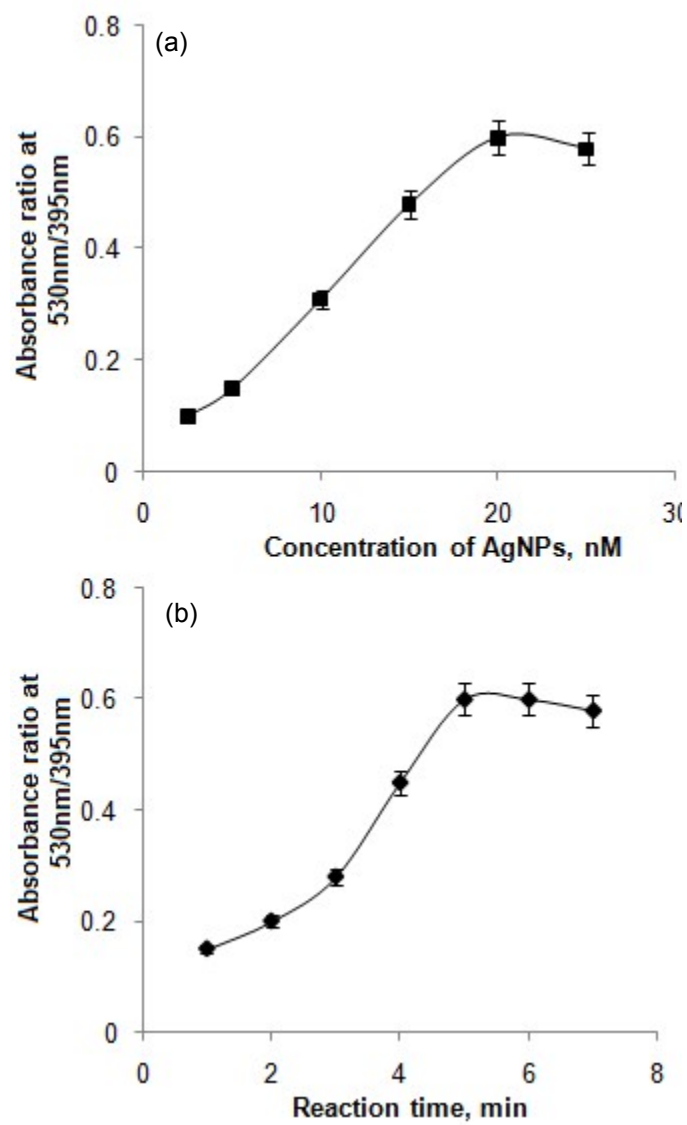

**Fig. S2.** (a) Effect of concentration of AgNPs/TA and (b) reaction time on absorbance ratio for determination of chromium ( $50 \mu\text{gL}^{-1}$ ) at pH 7.0 at room temperature
